# Supplementary material
Source: MDPI journal article supplement (https://www.mdpi.com/2077-0472/10/10/458)
Supplement: s1 [file s1]

**The questionnaire S1.** Selected questions used in the article.

**A. General, economic, and financial questions:**

Economic size (ES)..... Production types (TF).....

Education:

- ☐ primary ☐ vocational training ☐ secondary  
☐ bachelor degree ☐ higher education MSc ☐ scientific education (PhD)

Is there already a known successor in running a farm?

- ☐ yes ☐ no ☐ it is difficult to say

Please give the following values, describing your farm:

The area of the Utilized Agricultural Area on which the activity is carried out (in ha) .....

including lease (ha) .....

The total number of animals in large livestock units .....

Share of plant cover on arable land during winter (%)? .....

A number of groups of plants .....

Share of agricultural income in total household income (in %) .....

The value of agricultural output.... Farm net income...

Value of gross investment... Value of equity....

Total liabilities... Value of assets...

**C. Other questions**

Indicate the importance of the farm's objectives (1-small important, 3-medium, 5-very important):

1/2/3/4/5 providing of income 1/2/3/4/5 ensuring continuity of running

1/2/3/4/5 increasing the value of assets 1/2/3/4/5 care for the environment

1/2/3/4/5 providing funds to the family 1/2/3/4/5 increase of output

1/2/3/4/5 modernization of the farm 1/2/3/4/5 stabilization of the economic situation of the family

**Table S1.** List of the explanatory variables used in the classification tree model (C&RT).

| Variables used in the first stage                                                                                                                                                                                                                                                                                                                                         |                                                                                                                                                                                                                                                                                                                                                                                                                                                                          |
|---------------------------------------------------------------------------------------------------------------------------------------------------------------------------------------------------------------------------------------------------------------------------------------------------------------------------------------------------------------------------|--------------------------------------------------------------------------------------------------------------------------------------------------------------------------------------------------------------------------------------------------------------------------------------------------------------------------------------------------------------------------------------------------------------------------------------------------------------------------|
| Quantitative                                                                                                                                                                                                                                                                                                                                                              | Qualitative                                                                                                                                                                                                                                                                                                                                                                                                                                                              |
| Total liabilities, utilized agricultural area, average farm capital, fertilizers per 1 ha, land value, cash flow, assets-absorption of income, the share of plant cover on arable land during winter, farm net income, gross investment, number of separate agricultural parcels, number of groups of plants, the share of agricultural income in total household income. | Economics size (ES), type of farming, level of education, is the education agricultural?, opinion on the wealth effect, is the successor known?, have measures been taken to improve the environment in the last three years?, investment situation, are you going to develop the farm?, sales under multiannual contracts, sales under short-term contracts, define your economic situation, use of rainwater, opinion on the use of own funds in the context of risks. |
| Variables finally used after the importance ranking in C&RT.                                                                                                                                                                                                                                                                                                              |                                                                                                                                                                                                                                                                                                                                                                                                                                                                          |
| Quantitative                                                                                                                                                                                                                                                                                                                                                              | Qualitative                                                                                                                                                                                                                                                                                                                                                                                                                                                              |
| Utilized agricultural area, the share of plant cover on arable land during winter, farm net income, assets-absorption of income, number of groups of plants, gross investment, farm capital, fertilizers per 1 ha, total liabilities.                                                                                                                                     | Type of farming, level of education, is the education agricultural?, use of rainwater, have measures been taken to improve the environment in the last three years?, investment situation, opinion on the wealth effect.                                                                                                                                                                                                                                                 |

Source: Own study based on the questionnaire survey.

**Table S2.** The coordinates for specific objectives in the agricultural holdings surveyed in the Wielkopolska region in multidimensional scaling.

| Specification of the objectives                       | Stress = .035; Alienation = .056 |             |
|-------------------------------------------------------|----------------------------------|-------------|
|                                                       | Dimension 1                      | Dimension 2 |
| providing of income                                   | 1.26217                          | -0.047671   |
| increasing the value of assets                        | -0.45874                         | -0.681282   |
| providing funds for the family                        | 1.24903                          | -0.110614   |
| modernization of farm                                 | -1.18069                         | -0.300182   |
| ensuring continuity of running                        | -0.18012                         | 0.062050    |
| care for the environment                              | -0.44187                         | 0.872094    |
| increase of output                                    | -1.02707                         | 0.128528    |
| stabilization of the economic situation of the family | 0.77730                          | 0.077077    |

Source: Own study based on the questionnaire survey.

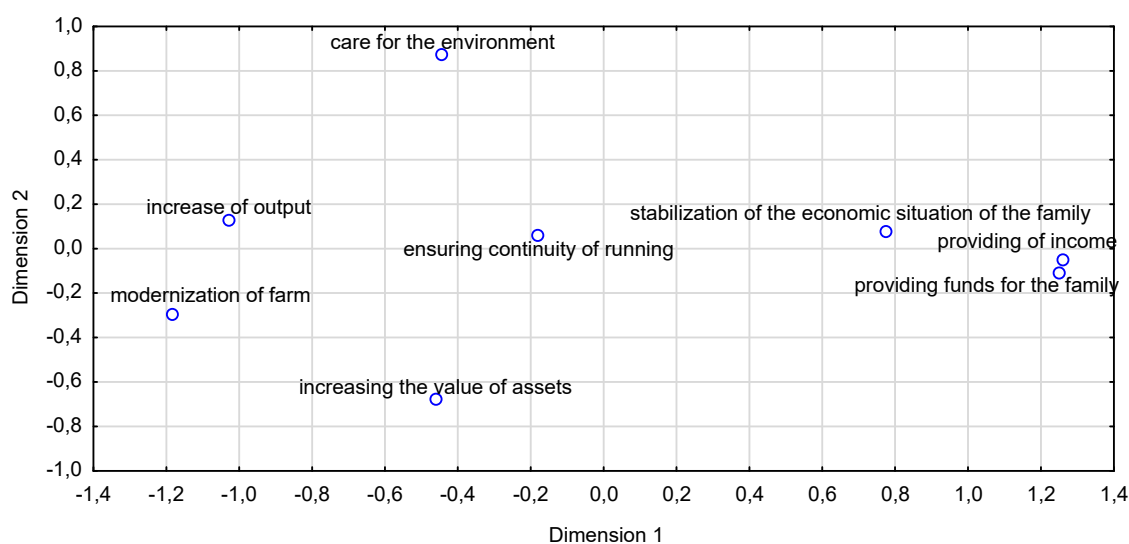

**Figure S1.** The distribution of the objectives of operation in the examined agricultural holdings in the Wielkopolska region in two-dimensional space from the perspective of the multidimensional scaling; N=120. Source: Own study based on the questionnaire survey.

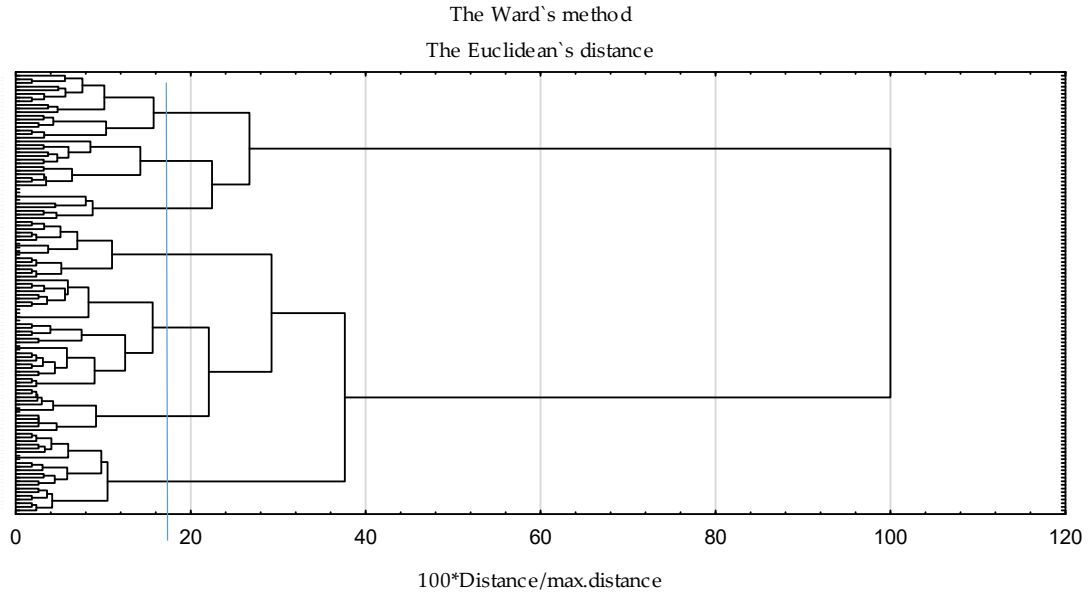

**Figure S2.** The dendrogram (the cluster analysis—the agglomeration) of the examined agricultural holdings in the Wielkopolska region due to the objectives of their operation; N=120. Source: Own study based on the questionnaire survey.

**Table S3.** The mean of the objectives of operation of the examined agricultural holdings in the Wielkopolska region due to the distinguished clusters (Figure S2).

| Specification                                         | Cluster<br>No. 1<br>N=34 | Cluster<br>No. 2<br>N=15 | Cluster<br>No. 3<br>N=21 | Cluster<br>No. 4<br>N=28 | Cluster<br>No. 5<br>N=22 |
|-------------------------------------------------------|--------------------------|--------------------------|--------------------------|--------------------------|--------------------------|
| providing of income                                   | 4.82                     | 4.67                     | 3.48                     | 4.61                     | 5.00                     |
| increasing the value of assets                        | 4.50                     | 3.27                     | 3.33                     | 3.04                     | 4.36                     |
| providing funds for the family                        | 4.82                     | 4.27                     | 3.05                     | 4.93                     | 4.91                     |
| modernization of farm                                 | 3.79                     | 1.93                     | 3.10                     | 3.71                     | 4.36                     |
| ensuring continuity of running                        | 4.03                     | 2.87                     | 3.38                     | 3.86                     | 4.82                     |
| care for the environment                              | 3.50                     | 3.60                     | 3.62                     | 3.82                     | 4.64                     |
| increase of output                                    | 3.85                     | 2.67                     | 3.05                     | 3.32                     | 4.27                     |
| stabilization of the economic situation of the family | 4.50                     | 4.13                     | 3.57                     | 4.46                     | 5.00                     |

The hierarchy of each objective from 1 to 5. Source: Own study based on the questionnaire survey.
